# Supplementary material for: Controlled polymerisation of lactide using an organo-catalyst in supercritical carbon dioxide
Source: Royal Society of Chemistry journal article supplement (doi:10.1039/c1gc15344g), 2011-01-01
Supplement: c1gc15344g.pdf [file c1gc15344g.pdf]

Electronic Supporting Information for:

## Controlled polymerisation of lactide using an organo-catalyst in supercritical carbon dioxide

Idriss Blakey,<sup>a\*</sup> Anguang Yu,<sup>a</sup> Steven M. Howdle<sup>b\*</sup> Andrew K. Whittaker<sup>a</sup> and Kristofer J. Thurecht,<sup>a</sup>

<sup>a</sup> The University of Queensland, Australian Institute for Bioengineering and Nanotechnology, and Centre for Advanced Imaging, Brisbane, Australia.

<sup>b</sup> University of Nottingham, School of Chemistry, Nottingham, UK.

\* Corresponding authors: i.blakey@uq.edu.au, Steve.Howdle@nottingham.ac.uk

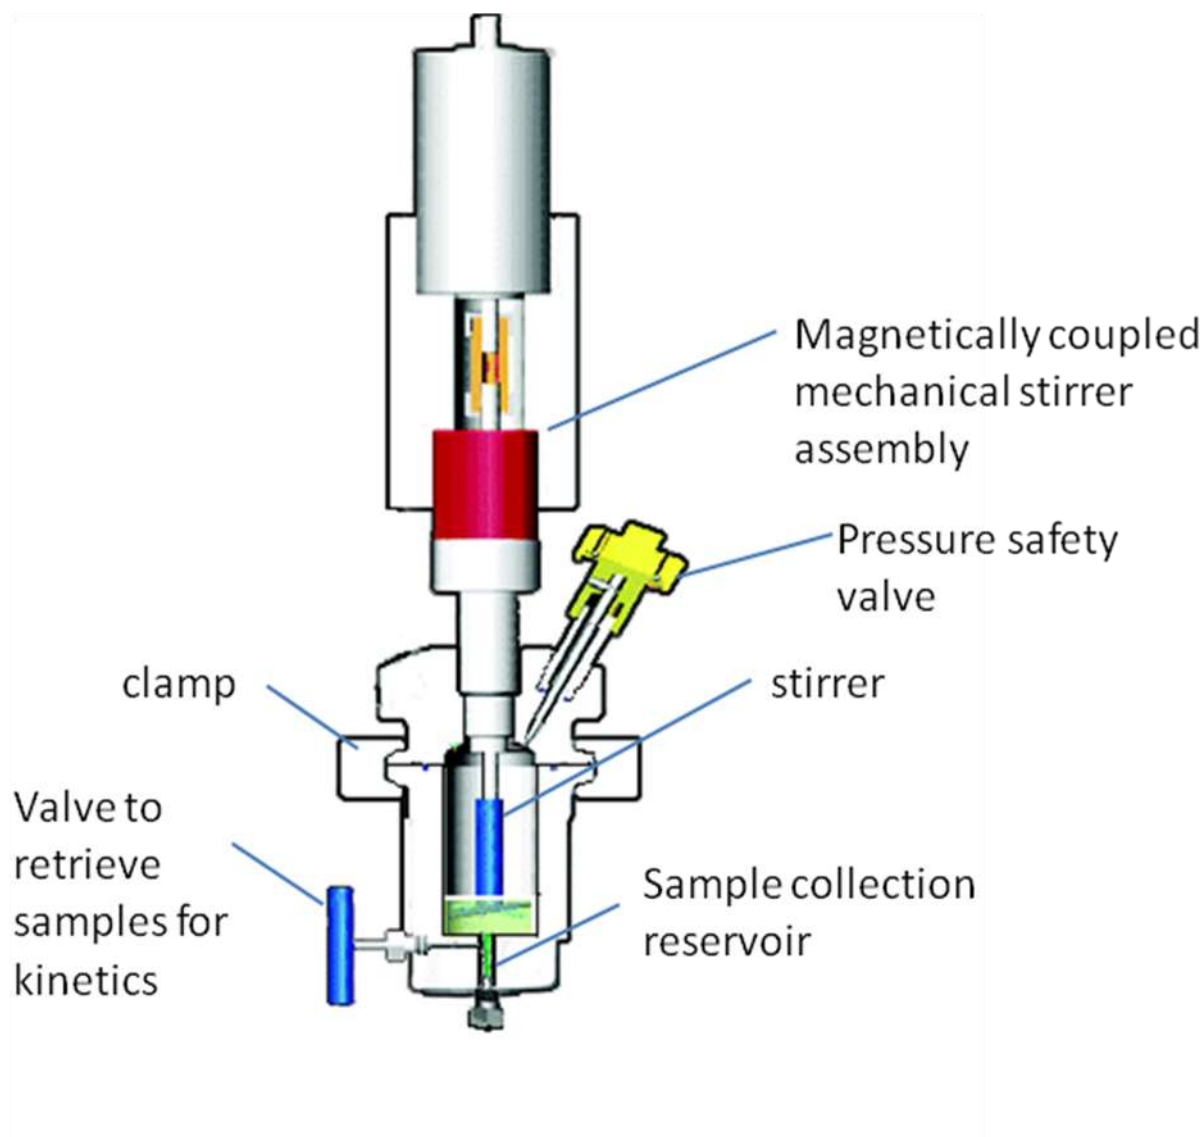

Figure S1 Diagram of the 60 mL high pressure reactor used for the kinetic sampling experiments in this study in this study.

The reactor for the batch experiments was 15 mL in volume, where the difference was that a different based was used that did not have the kinetic sampling valves, otherwise the setup was the same as in the figure above.

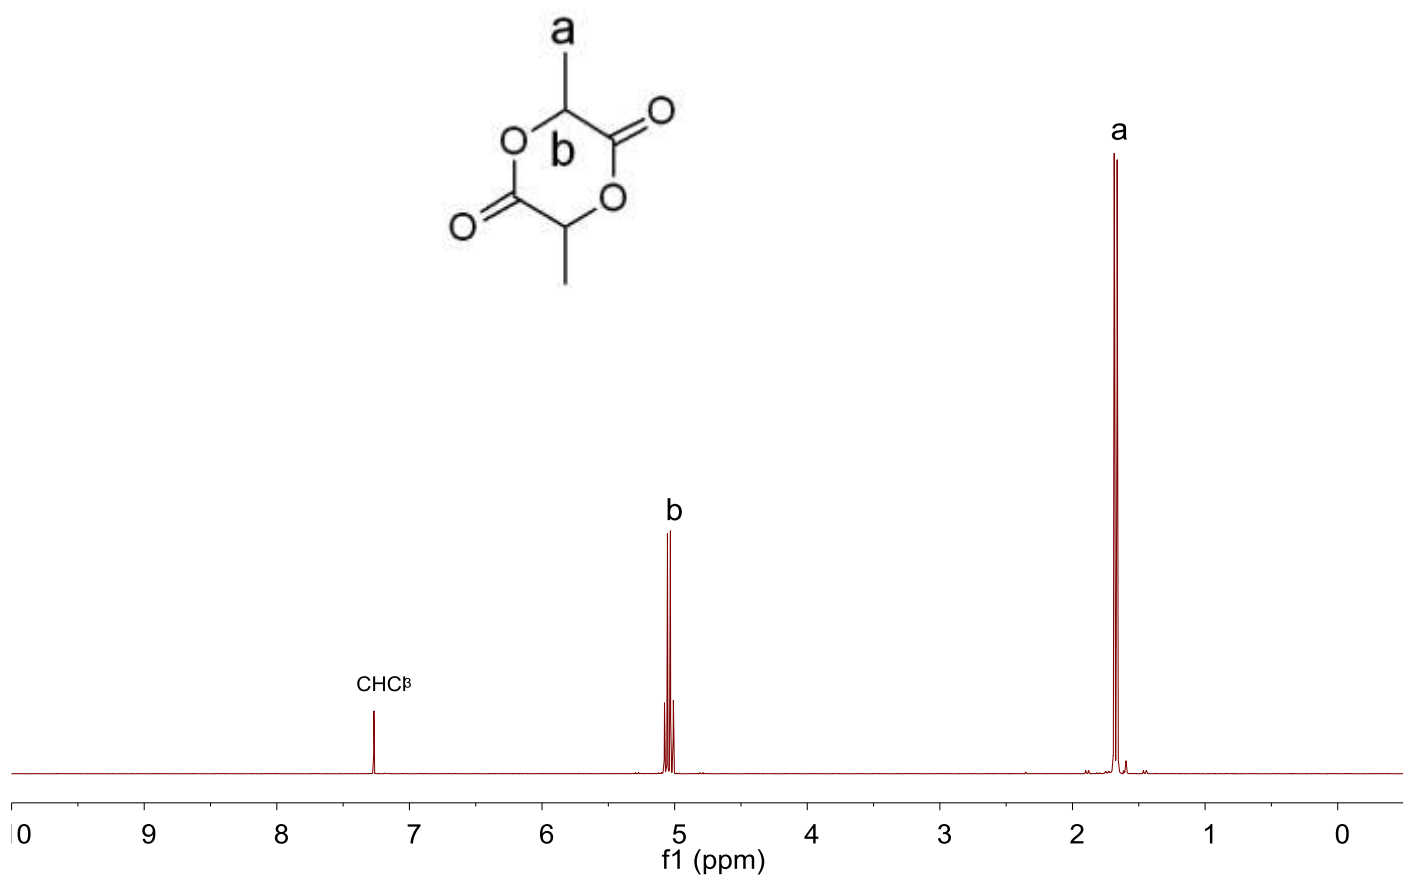

Figure S2 <sup>1</sup>H NMR of DL-lactide monomer

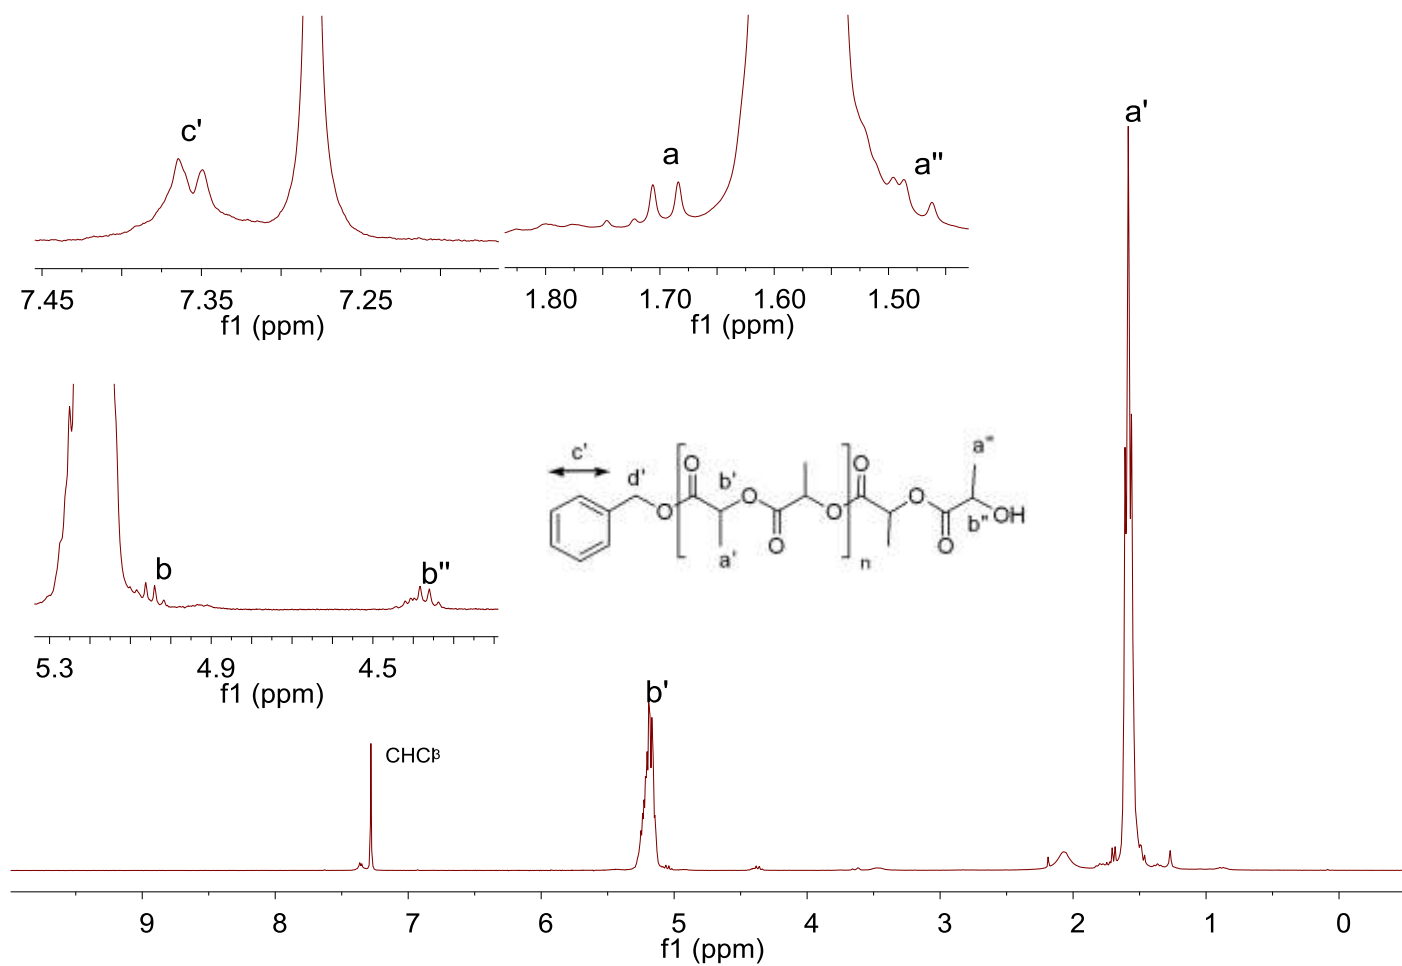

Figure S3  $^1\text{H}$  NMR of PDLA synthesised in supercritical  $\text{CO}_2$  at  $80^\circ\text{C}$  using benzyl alcohol as an initiator and DBU as a catalyst.

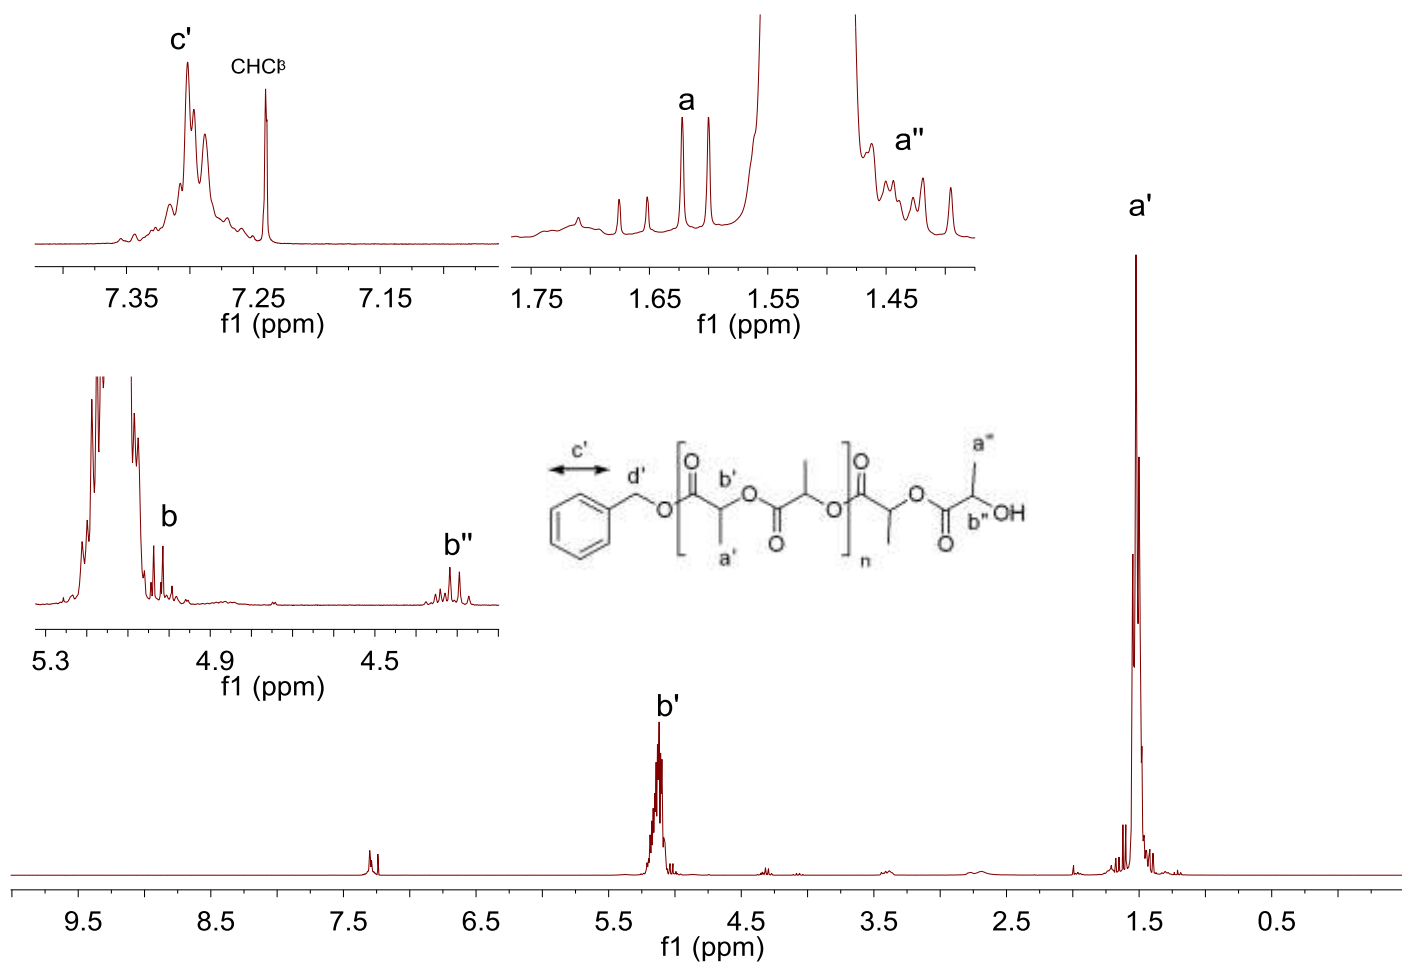

Figure S4  $^1\text{H}$  NMR of PDLA synthesised in the bulk at  $130^\circ\text{C}$  using benzyl alcohol as an initiator and DBU as a catalyst.
